# Supplementary material for: The extended day length promotes earlier flowering of bermudagrass
Source: PeerJ. 2022 Nov 16;10:e14326. doi: 10.7717/peerj.14326 (PMC9675341; doi:10.7717/peerj.14326)
Supplement: Data S1 [file peerj-10-14326-s004.xlsx]

## Sheet: light intensity and temperature
serial number	day	light intensity		temperature
1	0.00347222	78.1		23.291
2	0.00694444	1976.32		23.3898
3	0.0104167	1829.76		22.5032
4	0.0138889	1157.76		22.0359
5	0.0173611	1014.72		21.7529
6	0.0208333	931.52		21.5286
7	0.0243056	774.4		21.3737
8	0.0277778	689.92		21.1894
9	0.03125	1657.6		21.0079
10	0.0347222	6154.24		21.0773
11	0.0381944	6044.16		21.2749
12	0.0416667	5882.88		21.4031
13	0.0451389	5816.32		21.5286
14	0.0486111	5719.04		21.5286
15	0.0520833	5683.2		21.5713
16	0.0555556	5721.6		21.5846
17	0.0590278	5698.56		21.598
18	0.0625	5652.48		21.614
19	0.0659722	5688.32		21.5579
20	0.0694444	5744.64		21.5713
21	0.0729167	5734.4		21.5579
22	0.0763889	5790.72		21.5419
23	0.0798611	5675.52		21.5152
24	0.0833333	5667.84		21.5019
25	0.0868056	5716.48		21.4031
26	0.0902778	5693.44		21.4164
27	0.09375	5670.4		21.3737
28	0.0972222	5660.16		21.3737
29	0.100694	5678.08		21.3737
30	0.104167	5736.96		21.2909
31	0.107639	5688.32		21.2455
32	0.111111	5693.44		21.1894
33	0.114583	5721.6		21.0479
34	0.118056	5724.16		20.9785
35	0.121528	5703.68		20.9224
36	0.125	5683.2		20.853
37	0.128472	5744.64		20.8236
38	0.131944	5775.36		20.7408
39	0.135417	5716.48		20.6527
40	0.138889	5729.28		20.5405
41	0.142361	5542.4		20.4551
42	0.145833	5544.96		20.4284
43	0.149306	5770.24		20.3723
44	0.152778	5962.24		20.3857
45	0.15625	5992.96		20.399
46	0.159722	5982.72		20.3723
47	0.163194	5975.04		20.359
48	0.166667	5770.24		20.3162
49	0.170139	5806.08		20.2735
50	0.173611	5790.72		20.2308
51	0.177083	5788.16		20.1881
52	0.180556	5847.04		20.1614
53	0.184028	5811.2		20.1186
54	0.1875	5762.56		20.0919
55	0.190972	5793.28		20.0065
56	0.194444	5808.64		20.0492
57	0.197917	0.06		19.905
58	0.201389	0.06		19.5685
59	0.204861	0.06		19.3149
60	0.208333	0.04		19.0478
61	0.211806	0.04		18.8636
62	0.215278	0.04		18.7087
63	0.21875	0.04		18.5538
64	0.222222	0.04		18.4577
65	0.225694	0.04		18.3429
66	0.229167	0.02		18.3001
67	0.232639	0.04		18.2147
68	0.236111	0.02		18.172
69	0.239583	0.04		18.1453
70	0.243056	0.02		18.0598
71	0.246528	0.04		18.0198
72	0.25	0.03		17.9343
73	0.253472	0.03		17.8649
74	0.256944	0.03		17.8222
75	0.260417	0.03		17.7367
76	0.263889	0.03		17.7234
77	0.267361	0.03		17.6806
78	0.270833	0.03		17.5978
79	0.274306	0.03		17.5658
80	0.277778	0.01		17.4964
81	0.28125	3427.84		17.483
82	0.284722	5990.4		17.7527
83	0.288194	6008.32		18.0331
84	0.291667	6010.88		18.3135
85	0.295139	6016		18.471
86	0.298611	5975.04		18.6259
87	0.302083	5990.4		18.6954
88	0.305556	5954.56		18.7942
89	0.309028	5985.28		18.9063
90	0.3125	6008.32		18.9757
91	0.315972	5995.52		19.0185
92	0.319444	5959.68		19.0185
93	0.322917	5964.8		18.9757
94	0.326389	5959.68		18.9624
95	0.329861	5908.48		19.0051
96	0.333333	5928.96		19.0478
97	0.336806	5959.68		19.0185
98	0.340278	5952		19.0318
99	0.34375	5957.12		19.0612
100	0.347222	5949.44		19.0745
101	0.350694	5962.24		19.0612
102	0.354167	6010.88		19.0612
103	0.357639	5975.04		19.0612
104	0.361111	5982.72		19.0612
105	0.364583	5952		19.0745
106	0.368056	5980.16		19.0879
107	0.371528	5975.04		19.0318
108	0.375	5987.84		18.9757
109	0.378472	5962.24		18.9757
110	0.381944	5962.24		19.0185
111	0.385417	5975.04		18.9757
112	0.388889	6208		18.9757
113	0.392361	6202.88		19.0051
114	0.395833	6231.04		18.9757
115	0.399306	6008.32		18.9891
116	0.402778	6018.56		19.0185
117	0.40625	6000.64		18.9891
118	0.409722	5952		19.0478
119	0.413194	5977.6		19.1306
120	0.416667	6000.64		19.144
121	0.420139	6000.64		19.1733
122	0.423611	5982.72		19.2027
123	0.427083	5969.92		19.2027
124	0.430556	6021.12		19.2027
125	0.434028	6031.36		19.1733
126	0.4375	6028.8		19.2027
127	0.440972	6005.76		19.1306
128	0.444444	6036.48		19.0185
129	0.447917	6021.12		18.9757
130	0.451389	6016		18.8769
131	0.454861	6005.76		18.8636
132	0.458333	5992.96		18.7648
133	0.461806	5992.96		18.7247
134	0.465278	6021.12		18.6687
135	0.46875	6021.12		18.5966
136	0.472222	6008.32		18.5138
137	0.475694	5821.44		18.4417
138	0.479167	5998.08		18.3696
139	0.482639	6051.84		18.3135
140	0.486111	6041.6		18.2868
141	0.489583	6018.56		18.2574
142	0.493056	6008.32		18.1319
143	0.496528	6039.04		18.0892
144	0.5	6003.2		18.0198
145	0.503472	6008.32		18.0198
146	0.506944	5990.4		18.0198
147	0.510417	5990.4		18.0331
148	0.513889	5992.96		18.0758
149	0.517361	6016		18.1319
150	0.520833	5959.68		18.188
151	0.524306	5977.6		18.2441
152	0.527778	6031.36		18.3001
153	0.53125	6039.04		18.2574
154	0.534722	5990.4		18.2307
155	0.538194	5982.72		18.2708
156	0.541667	5977.6		18.2441
157	0.545139	5992.96		18.2574
158	0.548611	5980.16		18.2574
159	0.552083	5941.76		18.2574
160	0.555556	5957.12		18.2868
161	0.559028	5980.16		18.3562
162	0.5625	5998.08		18.3696
163	0.565972	6062.08		18.4016
164	0.569444	6090.24		18.471
165	0.572917	6190.08		18.4977
166	0.576389	6407.68		18.5538
167	0.579861	6440.96		18.5832
168	0.583333	6533.12		18.6099
169	0.586806	6707.2		18.7247
170	0.590278	7032.32		18.7648
171	0.59375	7216.64		18.7808
172	0.597222	7319.04		18.7808
173	0.600694	7493.12		18.8636
174	0.604167	7656.96		18.9197
175	0.607639	7861.76		18.9757
176	0.611111	7910.4		18.9757
177	0.614583	1982.72		18.9891
178	0.618056	2140.8		18.8369
179	0.621528	2253.44		18.6954
180	0.625	2045.44		18.6099
181	0.628472	2364.16		18.6259
182	0.631944	2458.88		18.7087
183	0.635417	2548.48		18.7808
184	0.638889	2812.16		18.8636
185	0.642361	2883.84		19.0185
186	0.645833	3004.16		19.144
187	0.649306	3063.04		19.2882
188	0.652778	3168		19.4297
189	0.65625	3255.04		19.654
190	0.659722	3475.2		19.8089
191	0.663194	3630.08		19.9931
192	0.666667	3779.84		20.1614
193	0.670139	4067.84		20.3429
194	0.673611	6407.68		20.853
195	0.677083	4504.32		21.1601
196	0.680556	4678.4		21.2161
197	0.684028	5104.64		21.3737
198	0.6875	5396.48		21.4858
199	0.690972	6937.6		21.7262
200	0.694444	10337.3		21.6541
201	0.697917	19072		22.052
202	0.701389	15549.4		22.4712
203	0.704861	14254.1		22.5593
204	0.708333	9838.08		22.5593
205	0.711806	10401.3		22.7008
206	0.715278	28764.2		23.2216
207	0.71875	27279.4		24.3645
208	0.722222	22917.1		24.9866
209	0.725694	17505.3		25.4486
210	0.729167	17428.5		25.6489
211	0.732639	8312.32		25.761
212	0.736111	15011.8		25.3792
213	0.739583	15887.4		25.1122
214	0.743056	9477.12		24.8985
215	0.746528	9198.08		24.4926
216	0.75	10214.4		24.279
217	0.753472	11212.8		24.2069
218	0.756944	12912.6		24.2229
219	0.760417	13107.2		24.3378
220	0.763889	15529		24.4633
221	0.767361	17116.2		24.7436
222	0.770833	11422.7		24.9573
223	0.774306	21381.1		25.1122
224	0.777778	16307.2		25.5768
225	0.78125	28661.8		25.8305
226	0.784722	12416		26.2417
227	0.788194	34027.5		26.5648
228	0.791667	7201.28		27.1149
229	0.795139	23490.6		26.8345
230	0.798611	17827.8		26.5221
231	0.802083	18892.8		26.5915
232	0.805556	13844.5		26.5782
233	0.809028	15370.2		26.4366
234	0.8125	24995.8		26.5648
235	0.815972	19440.6		26.8746
236	0.819444	22548.5		27.2137
237	0.822917	21309.4		27.4407
238	0.826389	20910.1		27.6917
239	0.829861	22261.8		27.6089
240	0.833333	14602.2		27.5101
241	0.836806	18590.7		27.2404
242	0.840278	18001.9		27.1149
243	0.84375	27770.9		27.2137
244	0.847222	14750.7		27.3098
245	0.850694	13880.3		27.4113
246	0.854167	10242.6		27.2404
247	0.857639	16506.9		26.8051
248	0.861111	11837.4		26.7464
249	0.864583	11581.4		26.5915
250	0.868056	11970.6		26.4233
251	0.871528	7969.28		26.2684
252	0.875	9323.52		26.0281
253	0.878472	21872.6		25.9293
254	0.881944	30986.2		26.466
255	0.885417	11351		26.9173
256	0.888889	22313		26.9173
257	0.892361	30300.2		27.2831
258	0.895833	35829.8		27.7077
259	0.899306	32225.3		28.37
260	0.902778	28416		28.864
261	0.90625	13353		28.864
262	0.909722	26439.7		28.7224
263	0.913194	26245.1		28.7945
264	0.916667	11100.2		28.5836
265	0.920139	22917.1		28.37
266	0.923611	9098.24		28.4394
267	0.927083	11079.7		28.0602
268	0.930556	9738.24		27.4407
269	0.934028	8693.76		27.454
270	0.9375	5437.44		27.0294
271	0.940972	5146.88		26.4099
272	0.944444	4876.8		26.1402
273	0.947917	6753.28		25.972
274	0.951389	4682.24		25.7477
275	0.954861	3980.8		25.5367
276	0.958333	4701.44		25.3498
277	0.961806	3576.32		25.211
278	0.965278	6051.84		25.0134
279	0.96875	4286.72		24.9706
280	0.972222	3034.88		24.757
281	0.975694	3200		24.5487
282	0.979167	3842.56		24.2069
283	0.982639	4311.04		24.0253
284	0.986111	2906.88		23.9399
285	0.989583	2346.24		23.6862
286	0.993056	2694.4		23.4886
287	0.996528	2638.08		23.3337
288	1	2056.96		23.2216
289	1.00347	2040.96		23.0373
290	1.00694	2204.8		22.8958
291	1.01042	2069.12		22.797
292	1.01389	1494.4		22.6581
293	1.01736	1251.2		22.4578
294	1.02083	1585.92		22.2629
295	1.02431	1248		22.052
296	1.02778	655.36		21.825
297	1.03125	1661.44		21.6407
298	1.03472	6338.56		21.7689
299	1.03819	6123.52		21.9238
300	1.04167	5888		22.0226
301	1.04514	5824		22.108
302	1.04861	5601.28		22.1775
303	1.05208	5575.68		22.1641
304	1.05556	5670.4		22.1214
305	1.05903	5629.44		22.0359
306	1.0625	5573.12		21.9665
307	1.06597	5693.44		21.9104
308	1.06944	5724.16		21.8517
309	1.07292	5683.2		21.8517
310	1.07639	5706.24		21.7395
311	1.07986	5670.4		21.6968
312	1.08333	5616.64		21.614
313	1.08681	5662.72		21.5019
314	1.09028	5652.48		21.4591
315	1.09375	5734.4		21.4031
316	1.09722	5683.2		21.3043
317	1.10069	5729.28		21.2028
318	1.10417	5693.44		21.1334
319	1.10764	5696		21.0906
320	1.11111	5749.76		21.0346
321	1.11458	5757.44		20.9224
322	1.11806	5688.32		20.853
323	1.12153	5693.44		20.8103
324	1.125	5655.04		20.7408
325	1.12847	5680.64		20.626
326	1.13194	5675.52		20.5112
327	1.13542	5655.04		20.4551
328	1.13889	5719.04		20.359
329	1.14236	5826.56		20.2869
330	1.14583	5824		20.2602
331	1.14931	5711.36		20.2602
332	1.15278	5670.4		20.2602
333	1.15625	5726.72		20.2468
334	1.15972	5731.84		20.2041
335	1.16319	5739.52		20.1614
336	1.16667	5706.24		20.1053
337	1.17014	5716.48		20.0492
338	1.17361	5744.64		20.0198
339	1.17708	5772.8		20.0198
340	1.18056	5813.76		20.0198
341	1.18403	5762.56		19.9798
342	1.1875	5916.16		19.905
343	1.19097	5900.8		19.8489
344	1.19444	5954.56		19.8089
345	1.19792	0.03		19.7368
346	1.20139	0.03		19.387
347	1.20486	0.03		19.0612
348	1.20833	0.02		18.7514
349	1.21181	0.03		18.4977
350	1.21528	0.02		18.3001
351	1.21875	0		18.0331
352	1.22222	0.02		17.8782
353	1.22569	0.02		17.7794
354	1.22917	0.02		17.6673
355	1.23264	0.02		17.5257
356	1.23611	0.02		17.4269
357	1.23958	0.02		17.3148
358	1.24306	0.02		17.2587
359	1.24653	0.02		17.2026
360	1.25	0.02		17.1038
361	1.25347	0.02		17.0317
362	1.25694	0.02		16.949
363	1.26042	0.02		16.8635
364	1.26389	0.02		16.7914
365	1.26736	0.02		16.7914
366	1.27083	0.02		16.6793
367	1.27431	0.02		16.6232
368	1.27778	0.02		16.5671
369	1.28125	3303.68		16.5537
370	1.28472	5831.68		16.8235
371	1.28819	5793.28		17.0878
372	1.29167	5747.2		17.3415
373	1.29514	5772.8		17.5818
374	1.29861	5790.72		17.7527
375	1.30208	5800.96		17.8782
376	1.30556	5754.88		17.8916
377	1.30903	5729.28		17.9477
378	1.3125	5757.44		17.9637
379	1.31597	5742.08		17.9904
380	1.31944	5734.4		18.0331
381	1.32292	5711.36		18.0037
382	1.32639	5736.96		18.0331
383	1.32986	5765.12		18.0331
384	1.33333	5757.44		18.0465
385	1.33681	5790.72		18.0331
386	1.34028	5777.92		18.0598
387	1.34375	5788.16		18.0198
388	1.34722	5777.92		18.0331
389	1.35069	5775.36		18.0465
390	1.35417	5729.28		17.9904
391	1.35764	5706.24		17.9904
392	1.36111	5754.88		17.9637
393	1.36458	5760		17.921
394	1.36806	5754.88		17.921
395	1.37153	5726.72		17.8782
396	1.375	5744.64		17.8515
397	1.37847	5760		17.8355
398	1.38194	5762.56		17.7928
399	1.38542	5767.68		17.8088
400	1.38889	5729.28		17.7794
401	1.39236	5747.2		17.7928
402	1.39583	5752.32		17.7928
403	1.39931	5765.12		17.7661
404	1.40278	5749.76		17.7367
405	1.40625	5726.72		17.7367
406	1.40972	5739.52		17.7367
407	1.41319	5744.64		17.7367
408	1.41667	5757.44		17.71
409	1.42014	5800.96		17.7234
410	1.42361	5770.24		17.7367
411	1.42708	5731.84		17.7234
412	1.43056	5734.4		17.7234
413	1.43403	5736.96		17.6967
414	1.4375	5747.2		17.6673
415	1.44097	5765.12		17.6806
416	1.44444	5760		17.6967
417	1.44792	5742.08		17.7234
418	1.45139	5762.56		17.7234
419	1.45486	5767.68		17.7527
420	1.45833	5800.96		17.71
421	1.46181	5775.36		17.7794
422	1.46528	5734.4		17.6967
423	1.46875	5744.64		17.6245
424	1.47222	5752.32		17.6112
425	1.47569	5742.08		17.5818
426	1.47917	5719.04		17.5658
427	1.48264	5726.72		17.5525
428	1.48611	5739.52		17.5658
429	1.48958	5770.24		17.5658
430	1.49306	5785.6		17.5257
431	1.49653	5752.32		17.483
432	1.5	5772.8		17.3842
433	1.50347	5760		17.3148
434	1.50694	5734.4		17.3148
435	1.51042	5719.04		17.3148
436	1.51389	5537.28		17.2988
437	1.51736	5757.44		17.2293
438	1.52083	5749.76		17.2427
439	1.52431	5739.52		17.1866
440	1.52778	5703.68		17.2026
441	1.53125	5736.96		17.2026
442	1.53472	5767.68		17.1866
443	1.53819	5772.8		17.2427
444	1.54167	5760		17.216
445	1.54514	5726.72		17.1866
446	1.54861	5729.28		17.216
447	1.55208	5739.52		17.1733
448	1.55556	5857.28		17.1599
449	1.55903	5849.6		17.1305
450	1.5625	5793.28		17.1466
451	1.56597	5811.2		17.1172
452	1.56944	5875.2		17.1466
453	1.57292	5952		17.0878
454	1.57639	6064.64		17.1038
455	1.57986	6251.52		17.1038
456	1.58333	6435.84		17.1172
457	1.58681	6679.04		17.1733
458	1.59028	6899.2		17.3281
459	1.59375	6978.56		17.4964
460	1.59722	7121.92		17.6406
461	1.60069	7027.2		17.7661
462	1.60417	7173.12		17.921
463	1.60764	7610.88		17.9637
464	1.61111	8053.76		18.1025
465	1.61458	2625.28		18.172
466	1.61806	2919.68		18.0758
467	1.62153	2668.8		17.977
468	1.625	2390.4		17.9076
469	1.62847	2480.64		17.8916
470	1.63194	2606.72		17.9076
471	1.63542	2862.08		17.9477
472	1.63889	2598.4		18.0465
473	1.64236	3184.64		18.1025
474	1.64583	3118.08		18.2441
475	1.64931	4730.88		18.3696
476	1.65278	5585.92		18.6393
477	1.65625	5601.28		18.949
478	1.65972	6051.84		19.1733
479	1.66319	6269.44		19.4564
480	1.66667	5870.08		19.7501
481	1.67014	5964.8		19.921
482	1.67361	6154.24		20.0759
483	1.67708	6771.2		20.1881
484	1.68056	7040		20.3723
485	1.68403	7457.28		20.4978
486	1.6875	5969.92		20.5539
487	1.69097	5573.12		20.5966
488	1.69444	1445.76		20.5405
489	1.69792	5157.12		20.4978
490	1.70139	5049.6		20.415
491	1.70486	4727.04		20.3723
492	1.70833	4700.16		20.3029
493	1.71181	5429.76		20.3029
494	1.71528	6108.16		20.3296
495	1.71875	6254.08		20.359
496	1.72222	6300.16		20.4284
497	1.72569	6277.12		20.4978
498	1.72917	6643.2		20.5833
499	1.73264	7057.92		20.6687
500	1.73611	9395.2		20.8236
501	1.73958	9753.6		21.0212
502	1.74306	8427.52		21.2749
503	1.74653	7889.92		21.4164
504	1.75	7362.56		21.4725
505	1.75347	6955.52		21.5286
506	1.75694	6945.28		21.5713
507	1.76042	8312.32		21.6701
508	1.76389	8435.2		21.8517
509	1.76736	7703.04		21.9665
510	1.77083	7116.8		21.9665
511	1.77431	6090.24		22.0226
512	1.77778	6952.96		21.9959
513	1.78125	10736.6		22.0787
514	1.78472	12538.9		22.319
515	1.78819	12405.8		22.5593
516	1.79167	8212.48		22.7836
517	1.79514	17863.7		22.8691
518	1.79861	8079.36		22.9946
519	1.80208	7715.84		23.0079
520	1.80556	7961.6		22.9252
521	1.80903	9615.36		23.0079
522	1.8125	11550.7		23.2643
523	1.81597	9894.4		23.4058
524	1.81944	9510.4		23.5313
525	1.82292	8517.12		23.4886
526	1.82639	8757.76		23.4886
527	1.82986	9722.88		23.518
528	1.83333	10122.2		23.6007
529	1.83681	10813.4		23.7717
530	1.84028	12523.5		23.8838
531	1.84375	13327.4		24.279
532	1.84722	16051.2		24.6315
533	1.85069	12323.8		24.8985
534	1.85417	11125.8		24.9119
535	1.85764	11130.9		24.8852
536	1.86111	15872		25.0561
537	1.86458	15882.2		25.4353
538	1.86806	16604.2		25.6489
539	1.87153	14576.6		25.8598
540	1.875	11996.2		25.9854
541	1.87847	11934.7		25.956
542	1.88194	8967.68		25.9159
543	1.88542	9297.92		25.7317
544	1.88889	9208.32		25.5768
545	1.89236	9244.16		25.5047
546	1.89583	10426.9		25.4219
547	1.89931	7531.52		25.3231
548	1.90278	7352.32		25.0828
549	1.90625	7654.4		24.8985
550	1.90972	8570.88		24.7303
551	1.91319	9136.64		24.7997
552	1.91667	6115.84		24.6742
553	1.92014	6760.96		24.4766
554	1.92361	8163.84		24.4205
555	1.92708	7846.4		24.5487
556	1.93056	8906.24		24.6048
557	1.93403	10147.8		24.7864
558	1.9375	6425.6		24.7997
559	1.94097	5312		24.6448
560	1.94444	6440.96		24.5487
561	1.94792	5941.76		24.4766
562	1.95139	6282.24		24.4339
563	1.95486	5716.48		24.5754
564	1.95833	5205.76		24.6448
565	1.96181	5529.6		24.6048
566	1.96528	3215.36		24.4339
567	1.96875	3586.56		24.1241
568	1.97222	3444.48		23.8571
569	1.97569	3022.08		23.574
570	1.97917	2574.72		23.3204
571	1.98264	2540.16		23.1228
572	1.98611	2801.92		22.9679
573	1.98958	2835.2		22.7703
574	1.99306	1568		22.6448
575	1.99653	1441.28		22.4899
576	2	1480.96		22.2763
577	2.00347	1475.2		22.108
578	2.00694	944.96		21.9532
579	2.01042	705.92		21.7529
580	2.01389	678.08		21.5579
581	2.01736	600.16		21.3897
582	2.02083	415.68		21.2455
583	2.02431	395.84		21.12
584	2.02778	245.6		20.9918
585	2.03125	1521.28		20.8797
586	2.03472	6231.04		21.0346
587	2.03819	6215.68		21.2615
588	2.04167	6241.28		21.4164
589	2.04514	6169.6		21.5846
590	2.04861	6092.8		21.6834
591	2.05208	6013.44		21.7395
592	2.05556	6026.24		21.825
593	2.05903	5975.04		21.825
594	2.0625	6008.32		21.7529
595	2.06597	6018.56		21.825
596	2.06944	5992.96		21.7529
597	2.07292	6013.44		21.6968
598	2.07639	6085.12		21.6701
599	2.07986	5990.4		21.7689
600	2.08333	6062.08		21.6701
601	2.08681	6100.48		21.598
602	2.09028	6051.84		21.6407
603	2.09375	6028.8		21.5286
604	2.09722	5985.28		21.5846
605	2.10069	6049.28		21.4858
606	2.10417	6082.56		21.4725
607	2.10764	6036.48		21.4858
608	2.11111	6146.56		21.5579
609	2.11458	6059.52		21.5846
610	2.11806	6077.44		21.5419
611	2.12153	6095.36		21.5579
612	2.125	6108.16		21.4031
613	2.12847	6072.32		21.3043
614	2.13194	6082.56		21.2615
615	2.13542	6138.88		21.1894
616	2.13889	6131.2		21.0906
617	2.14236	6036.48		21.12
618	2.14583	6120.96		21.0639
619	2.14931	6077.44		20.9918
620	2.15278	6085.12		20.9651
621	2.15625	6103.04		20.9358
622	2.15972	6103.04		20.9224
623	2.16319	6190.08		20.9091
624	2.16667	6133.76		20.8663
625	2.17014	6128.64		20.8236
626	2.17361	6177.28		20.837
627	2.17708	6138.88		20.9358
628	2.18056	6138.88		20.837
629	2.18403	6172.16		20.7969
630	2.1875	6164.48		20.7675
631	2.19097	6161.92		20.7969
632	2.19444	6100.48		20.7675
633	2.19792	0.08		20.626
634	2.20139	0.07		20.3162
635	2.20486	0.07		20.0626
636	2.20833	0.07		19.8222
637	2.21181	0.06		19.5819
638	2.21528	0.06		19.4003
639	2.21875	0.06		19.2588
640	2.22222	0.07		19.1039
641	2.22569	0.04		18.9757
642	2.22917	0.04		18.8769
643	2.23264	0.03		18.8209
644	2.23611	0.04		18.7648
645	2.23958	0.03		18.6687
646	2.24306	0.03		18.5832
647	2.24653	0.03		18.4977
648	2.25	0.03		18.471
649	2.25347	0.01		18.4016
650	2.25694	0.01		18.3829
651	2.26042	0.01		18.3429
652	2.26389	0.03		18.3268
653	2.26736	0.01		18.3001
654	2.27083	0.03		18.2441
655	2.27431	0.03		18.2013
656	2.27778	0.01		18.1453
657	2.28125	3976.96		18.1453
658	2.28472	6341.12		18.3696
659	2.28819	6353.92		18.6526
660	2.29167	6364.16		18.893
661	2.29514	6330.88		19.0879
662	2.29861	6310.4		19.2321
663	2.30208	6315.52		19.387
664	2.30556	6346.24		19.443
665	2.30903	6330.88		19.4697
666	2.3125	6318.08		19.4991
667	2.31597	6284.8		19.4858
668	2.31944	6289.92		19.443
669	2.32292	6289.92		19.387
670	2.32639	6341.12		19.3576
671	2.32986	6323.2		19.4003
672	2.33333	6287.36		19.3309
673	2.33681	6292.48		19.3309
674	2.34028	6320.64		19.3149
675	2.34375	6320.64		19.2748
676	2.34722	6310.4		19.2454
677	2.35069	6297.6		19.2454
678	2.35417	6289.92		19.2187
679	2.35764	6302.72		19.1894
680	2.36111	6300.16		19.16
681	2.36458	6282.24		19.1894
682	2.36806	6261.76		19.1733
683	2.37153	6297.6		19.1306
684	2.375	6295.04		19.16
685	2.37847	6228.48		19.1733
686	2.38194	6246.4		19.16
687	2.38542	6302.72		19.1733
688	2.38889	6312.96		19.1306
689	2.39236	6323.2		19.1039
690	2.39583	6272		19.0185
691	2.39931	6295.04		19.0051
692	2.40278	6305.28		19.0051
693	2.40625	6310.4		18.949
694	2.40972	6082.56		18.893
695	2.41319	6307.84		18.893
696	2.41667	6287.36		18.9197
697	2.42014	6323.2		18.8769
698	2.42361	6318.08		18.8075
699	2.42708	6310.4		18.8209
700	2.43056	6336		18.7942
701	2.43403	6307.84		18.8209
702	2.4375	6336		18.8209
703	2.44097	6325.76		18.8075
704	2.44444	6289.92		18.8209
705	2.44792	6300.16		18.7514
706	2.45139	6336		18.7808
707	2.45486	6315.52		18.8075
708	2.45833	6297.6		18.7808
709	2.46181	6320.64		18.7942
710	2.46528	6371.84		18.7808
711	2.46875	6353.92		18.7942
712	2.47222	6359.04		18.8075
713	2.47569	6302.72		18.7942
714	2.47917	6289.92		18.8075
715	2.48264	6302.72		18.8209
716	2.48611	6297.6		18.8502
717	2.48958	6300.16		18.8369
718	2.49306	6282.24		18.8075
719	2.49653	6310.4		18.7514
720	2.5	6264.32		18.7247
721	2.50347	6343.68		18.6687
722	2.50694	6297.6		18.6526
723	2.51042	6333.44		18.5966
724	2.51389	6149.12		18.6099
725	2.51736	6300.16		18.5966
726	2.52083	6272		18.5405
727	2.52431	6261.76		18.5405
728	2.52778	6320.64		18.5271
729	2.53125	6307.84		18.4577
730	2.53472	6269.44		18.4283
731	2.53819	6241.28		18.4417
732	2.54167	6346.24		18.3829
733	2.54514	6305.28		18.4283
734	2.54861	6310.4		18.415
735	2.55208	6272		18.3829
736	2.55556	6236.16		18.3429
737	2.55903	6300.16		18.3562
738	2.5625	6297.6		18.3829
739	2.56597	6330.88		18.4577
740	2.56944	6415.36		18.5538
741	2.57292	6456.32		18.4844
742	2.57639	6551.04		18.4844
743	2.57986	6533.12		18.4577
744	2.58333	6622.72		18.415
745	2.58681	6850.56		18.3696
746	2.59028	7111.68		18.3829
747	2.59375	7541.76		18.5271
748	2.59722	7680		18.5966
749	2.60069	7690.24		18.7381
750	2.60417	7467.52		19.0185
751	2.60764	7997.44		19.16
752	2.61111	8517.12		19.3149
753	2.61458	2840.32		19.4003
754	2.61806	2341.76		19.2454
755	2.62153	1793.92		19.144
756	2.625	1744.64		18.949
757	2.62847	1882.88		18.6687
758	2.63194	1837.44		18.471
759	2.63542	2417.92		18.3268
760	2.63889	2488.32		18.3135
761	2.64236	3075.84		18.3429
762	2.64583	3203.84		18.471
763	2.64931	3493.12		18.5966
764	2.65278	2276.48		18.7381
765	2.65625	3002.88		18.8075
766	2.65972	4067.84		18.9197
767	2.66319	3901.44		19.1039
768	2.66667	4515.84		19.3015
769	2.67014	4527.36		19.5685
770	2.67361	4780.8		19.7662
771	2.67708	5501.44		19.905
772	2.68056	6894.08		20.0919
773	2.68403	5117.44		20.2602
774	2.6875	14003.2		20.853
775	2.69097	7854.08		21.6274
776	2.69444	11002.9		21.9959
777	2.69792	7649.28		22.2068
778	2.70139	7180.8		22.4578
779	2.70486	7708.16		22.7008
780	2.70833	8074.24		22.9946
781	2.71181	12293.1		23.3898
782	2.71528	16624.6		23.9399
783	2.71875	23869.4		24.2229
784	2.72222	28241.9		24.7997
785	2.72569	32665.6		25.5928
786	2.72917	14192.6		26.0842
787	2.73264	23746.6		26.1109
788	2.73611	28129.3		25.972
789	2.73958	12764.2		26.3806
790	2.74306	33771.5		26.3378
791	2.74653	35635.2		27.1843
792	2.75	35676.2		27.6356
793	2.75347	32655.4		27.9454
794	2.75694	15820.8		27.916
795	2.76042	7992.32		27.7211
796	2.76389	8704		27.2538
797	2.76736	10537		26.9867
798	2.77083	12697.6		27.0161
799	2.77431	14351.4		27.171
800	2.77778	17187.8		27.6783
801	2.78125	37048.3		28.5969
802	2.78472	38912		29.1176
803	2.78819	39311.4		29.7238
804	2.79167	24637.4		30.3433
805	2.79514	42516.5		30.557
806	2.79861	43130.9		31.2619
807	2.80208	35020.8		31.4435
808	2.80556	31416.3		31.7132
809	2.80903	41697.3		31.9108
810	2.8125	36751.4		32.2793
811	2.81597	27822.1		32.3487
812	2.81944	14223.4		32.4475
813	2.82292	24033.3		32.1084
814	2.82639	38062.1		32.3621
815	2.82986	28938.2		32.5757
816	2.83333	33249.3		32.8988
817	2.83681	21278.7		32.9709
818	2.84028	19681.3		32.6184
819	2.84375	14356.5		32.2633
820	2.84722	18759.7		31.6438
821	2.85069	24709.1		31.6011
822	2.85417	6563.84		31.051
823	2.85764	7242.24		30.1057
824	2.86111	14264.3		29.3446
825	2.86458	10355.2		29.1577
826	2.86806	13552.6		28.8773
827	2.87153	10319.4		28.6236
828	2.875	10926.1		28.3967
829	2.87847	13276.2		28.2979
830	2.88194	10839		28.4127
831	2.88542	23408.6		28.7091
832	2.88889	22886.4		29.2325
833	2.89236	15861.8		29.6117
834	2.89583	19804.2		29.6517
835	2.89931	20377.6		29.8947
836	2.90278	18734.1		30.1057
837	2.90625	18652.2		30.119
838	2.90972	15380.5		30.119
839	2.91319	11013.1		29.7799
840	2.91667	13388.8		29.4701
841	2.92014	9047.04		29.2592
842	2.92361	10444.8		28.8346
843	2.92708	8227.84		28.6236
844	2.93056	7152.64		28.1723
845	2.93403	6661.12		27.7478
846	2.9375	6656		27.5101
847	2.94097	6415.36		27.2404
848	2.94444	5824		27.0027
849	2.94792	5995.52		26.8051
850	2.95139	4871.68		26.6209
851	2.95486	4757.76		26.3672
852	2.95833	4785.92		26.1109
853	2.96181	3388.16		25.7744
854	2.96528	3537.92		25.4059
855	2.96875	3512.32		25.0828
856	2.97222	3192.32		24.8291
857	2.97569	2675.2		24.5754
858	2.97917	2635.52		24.3217
859	2.98264	2000		24.0814
860	2.98611	2017.28		23.8571
861	2.98958	2168.32		23.6141
862	2.99306	2135.68		23.4459
863	2.99653	1904.64		23.2776
864	3	1934.08		23.1521
865	3.00347	1652.48		22.9946
866	3.00694	1489.92		22.8691
867	3.01042	1159.36		22.7409
868	3.01389	913.6		22.602
869	3.01736	268.72		22.4018
870	3.02083	584.64		22.2335
871	3.02431	443.52		22.0787
872	3.02778	341.12		21.9959
873	3.03125	1661.44		21.8837
874	3.03472	6138.88		22.0226
875	3.03819	6026.24		22.2896
876	3.04167	5831.68		22.4018
877	3.04514	5921.28		22.5299
878	3.04861	5849.6		22.602
879	3.05208	5870.08		22.6715
880	3.05556	5972.48		22.7409
881	3.05903	5870.08		22.7836
882	3.0625	5839.36		22.7836
883	3.06597	5852.16		22.797
884	3.06944	5903.36		22.6581
885	3.07292	5841.92		22.4899
886	3.07639	5775.36		22.4311
887	3.07986	5790.72		22.5166
888	3.08333	5829.12		22.546
889	3.08681	5898.24		22.602
890	3.09028	5888		22.6581
891	3.09375	5893.12		22.7409
892	3.09722	5857.28		22.6715
893	3.10069	5847.04		22.7008
894	3.10417	5893.12		22.7142
895	3.10764	5831.68		22.7142
896	3.11111	5857.28		22.7275
897	3.11458	5859.84		22.7569
898	3.11806	5885.44		22.7008
899	3.12153	5806.08		22.7008
900	3.125	5847.04		22.5593
901	3.12847	5885.44		22.5593
902	3.13194	5931.52		22.5032
903	3.13542	5908.48		22.4578
904	3.13889	5857.28		22.4018
905	3.14236	5882.88		22.3884
906	3.14583	5864.96		22.5032
907	3.14931	5875.2		22.3457
908	3.15278	5847.04		22.3457
909	3.15625	5847.04		22.3457
910	3.15972	5862.4		22.359
911	3.16319	5875.2		22.3751
912	3.16667	5923.84		22.359
913	3.17014	5905.92		22.3323
914	3.17361	5900.8		22.2629
915	3.17708	5854.72		22.1775
916	3.18056	5826.56		22.2335
917	3.18403	5946.88		22.2202
918	3.1875	5980.16		22.2202
919	3.19097	5985.28		22.108
920	3.19444	5969.92		22.1347
921	3.19792	0.07		21.9532
922	3.20139	0.07		21.5419
923	3.20486	0.06		21.2161
924	3.20833	0.06		20.9651
925	3.21181	0.06		20.6981
926	3.21528	0.06		20.399
927	3.21875	0.06		20.2041
928	3.22222	0.06		20.0198
929	3.22569	0.06		19.8783
930	3.22917	0.05		19.7101
931	3.23264	0.05		19.5685
932	3.23611	0.04		19.443
933	3.23958	0.03		19.3709
934	3.24306	0.04		19.3149
935	3.24653	0.04		19.2588
936	3.25	0.04		19.1894
937	3.25347	0.04		19.16
938	3.25694	0.04		19.144
939	3.26042	0.04		19.0478
940	3.26389	0.04		19.0478
941	3.26736	0.03		18.9891
942	3.27083	0.03		18.9624
943	3.27431	0.03		18.9063
944	3.27778	0.03		18.8502
945	3.28125	4248.32		18.8369
946	3.28472	6156.8		19.144
947	3.28819	6131.2		19.443
948	3.29167	6095.36		19.6941
949	3.29514	6023.68		19.8917
950	3.29861	6031.36		20.0759
951	3.30208	6033.92		20.148
952	3.30556	6054.4		20.2602
953	3.30903	6028.8		20.3296
954	3.3125	6036.48		20.3857
955	3.31597	6051.84		20.399
956	3.31944	6064.64		20.415
957	3.32292	6064.64		20.3723
958	3.32639	6062.08		20.3723
959	3.32986	6036.48		20.3857
960	3.33333	6051.84		20.3857
961	3.33681	6049.28		20.4284
962	3.34028	6031.36		20.4978
963	3.34375	6026.24		20.4551
964	3.34722	6051.84		20.3857
965	3.35069	6051.84		20.415
966	3.35417	6074.88		20.3429
967	3.35764	6051.84		20.3029
968	3.36111	6051.84		20.2468
969	3.36458	6036.48		20.2468
970	3.36806	6051.84		20.1747
971	3.37153	6039.04		20.2468
972	3.375	6044.16		20.2174
973	3.37847	6064.64		20.132
974	3.38194	6103.04		20.0626
975	3.38542	6144		19.9477
976	3.38889	6059.52		19.921
977	3.39236	6041.6		19.9344
978	3.39583	6077.44		19.8356
979	3.39931	6100.48		19.7662
980	3.40278	6054.4		19.654
981	3.40625	6041.6		19.5418
982	3.40972	6046.72		19.5819
983	3.41319	6062.08		19.5258
984	3.41667	6054.4		19.4858
985	3.42014	6044.16		19.5258
986	3.42361	6041.6		19.5819
987	3.42708	6062.08		19.5685
988	3.43056	6095.36		19.5552
989	3.43403	6095.36		19.4858
990	3.4375	6067.2		19.4297
991	3.44097	6044.16		19.3709
992	3.44444	6059.52		19.4297
993	3.44792	6067.2		19.3442
994	3.45139	6051.84		19.2748
995	3.45486	6033.92		19.3149
996	3.45833	6069.76		19.2187
997	3.46181	6044.16		19.2187
998	3.46528	6072.32		19.2187
999	3.46875	6092.8		19.1733
1000	3.47222	6077.44		19.0745
1001	3.47569	6062.08		19.0745
1002	3.47917	6039.04		18.933
1003	3.48264	6039.04		18.9063
1004	3.48611	6062.08		18.8636
1005	3.48958	6054.4		18.8502
1006	3.49306	6041.6		18.8636
1007	3.49653	6085.12		18.8369
1008	3.5	6039.04		18.7514
1009	3.50347	6036.48		18.7087
1010	3.50694	6095.36		18.6954
1011	3.51042	6087.68		18.6393
1012	3.51389	6049.28		18.5538
1013	3.51736	6054.4		18.4977
1014	3.52083	6056.96		18.5271
1015	3.52431	6056.96		18.4844
1016	3.52778	6049.28		18.4417
1017	3.53125	6018.56		18.3696
1018	3.53472	6023.68		18.2574
1019	3.53819	6039.04		18.2708
1020	3.54167	6044.16		18.3135
1021	3.54514	6039.04		18.2307
1022	3.54861	6041.6		18.2147
1023	3.55208	6090.24		18.172
1024	3.55556	6039.04		18.1319
1025	3.55903	6033.92		18.1319
1026	3.5625	6016		18.0758
1027	3.56597	6059.52		18.0465
1028	3.56944	5944.32		18.0331
1029	3.57292	6279.68		18.0892
1030	3.57639	6392.32		18.0331
1031	3.57986	6440.96		17.9904
1032	3.58333	6615.04		18.0198
1033	3.58681	6799.36		18.0198
1034	3.59028	6799.36		18.0758
1035	3.59375	6845.44		18.1025
1036	3.59722	6973.44		18.1586
1037	3.60069	7224.32		18.172
1038	3.60417	7344.64		18.2013
1039	3.60764	7539.2		18.3135
1040	3.61111	7659.52		18.4016
1041	3.61458	1939.84		18.3696
1042	3.61806	2081.92		18.2708
1043	3.62153	2287.36		18.172
1044	3.625	2275.2		17.9904
1045	3.62847	2429.44		17.977
1046	3.63194	2551.68		18.0037
1047	3.63542	2726.4		17.9343
1048	3.63889	3203.84		18.0037
1049	3.64236	3564.8		18.0198
1050	3.64583	3226.88		18.0598
1051	3.64931	3183.36		18.188
1052	3.65278	3325.44		18.2147
1053	3.65625	3435.52		18.3562
1054	3.65972	3566.08		18.4283
1055	3.66319	3728.64		18.5271
1056	3.66667	3979.52		18.5966
1057	3.67014	4157.44		18.7247
1058	3.67361	4509.44		18.933
1059	3.67708	4688.64		18.9891
1060	3.68056	4732.16		19.2748
1061	3.68403	10941.4		19.7368
1062	3.6875	21749.8		20.5673
1063	3.69097	6512.64		21.2455
1064	3.69444	12610.6		21.2455
1065	3.69792	20582.4		21.4591
1066	3.70139	14551		21.6968
1067	3.70486	11837.4		21.9398
1068	3.70833	7710.72		22.0653
1069	3.71181	7636.48		22.108
1070	3.71528	7626.24		22.108
1071	3.71875	8189.44		22.092
1072	3.72222	12892.2		22.3323
1073	3.72569	18754.6		22.7409
1074	3.72917	8186.88		23.1655
1075	3.73264	31406.1		23.4619
1076	3.73611	34252.8		24.2496
1077	3.73958	16860.2		24.5754
1078	3.74306	39843.8		24.8718
1079	3.74653	37161		25.4486
1080	3.75	34068.5		25.8171
1081	3.75347	6929.92		25.7183
1082	3.75694	6883.84		24.5621
1083	3.76042	7408.64		23.7583
1084	3.76389	35051.5		23.5019
1085	3.76736	36495.4		24.4926
1086	3.77083	43028.5		25.4219
1087	3.77431	42352.6		25.5768
1088	3.77778	43192.3		25.8999
1089	3.78125	44441.6		26.3806
1090	3.78472	35092.5		26.4794
1091	3.78819	51568.6		26.9734
1092	3.79167	48926.7		27.7771
1093	3.79514	52858.9		28.3566
1094	3.79861	51814.4		28.8773
1095	3.80208	53084.2		29.131
1096	3.80556	54845.4		29.4835
1097	3.80903	52469.8		29.7238
1098	3.8125	49070.1		29.2458
1099	3.81597	53473.3		29.1871
1100	3.81944	53534.7		29.5129
1101	3.82292	52408.3		29.8787
1102	3.82639	51445.8		30.0202
1103	3.82986	48988.2		30.1057
1104	3.83333	30740.5		29.8386
1105	3.83681	42967		29.5823
1106	3.84028	45690.9		29.0188
1107	3.84375	45486.1		29.1176
1108	3.84722	46284.8		29.2458
1109	3.85069	19932.2		29.2886
1110	3.85417	38543.4		28.7945
1111	3.85764	11479		28.2017
1112	3.86111	7959.04		27.3686
1113	3.86458	7298.56		26.5915
1114	3.86806	7119.36		25.8171
1115	3.87153	29122.6		25.4219
1116	3.875	38215.7		25.6355
1117	3.87847	38737.9		26.5782
1118	3.88194	36300.8		27.3098
1119	3.88542	33351.7		27.6089
1120	3.88889	34682.9		27.2965
1121	3.89236	33607.7		27.3846
1122	3.89583	28446.7		27.5101
1123	3.89931	30801.9		27.4674
1124	3.90278	30801.9		27.4674
1125	3.90625	21698.6		27.4674
1126	3.90972	24719.4		26.9173
1127	3.91319	9866.24		26.6342
1128	3.91667	12585		25.8171
1129	3.92014	8412.16		25.2937
1130	3.92361	5829.12		24.6448
1131	3.92708	5619.2		24.0948
1132	3.93056	5514.24		23.7449
1133	3.93403	5601.28		23.6568
1134	3.9375	4505.6		23.5874
1135	3.94097	4286.72		23.4192
1136	3.94444	7974.4		23.307
1137	3.94792	6348.8		23.4752
1138	3.95139	6638.08		23.518
1139	3.95486	5447.68		23.4459
1140	3.95833	4901.12		23.291
1141	3.96181	4746.24		23.1388
1142	3.96528	4179.2		23.0373
1143	3.96875	3475.2		22.8264
1144	3.97222	3032.32		22.3751
1145	3.97569	2876.16		22.0226
1146	3.97917	2929.92		21.809
1147	3.98264	2512.64		21.7102
1148	3.98611	2704.64		21.5579
1149	3.98958	2257.92		21.3176
1150	3.99306	2063.36		21.0639
1151	3.99653	1955.84		20.837
1152	4	1777.92		20.6527
1153	4.00347	1622.4		20.5112
1154	4.00694	1469.44		20.2602
1155	4.01042	1336.32		20.0759
1156	4.01389	1173.76		19.9931
1157	4.01736	973.12		19.905
1158	4.02083	827.52		19.6941
1159	4.02431	700.48		19.4297
1160	4.02778	575.2		19.2187
1161	4.03125	1640.96		19.0318
1162	4.03472	4431.36		19.1306
1163	4.03819	4389.12		19.2454
1164	4.04167	6376.96		19.2882
1165	4.04514	6274.56		19.5819
1166	4.04861	6220.8		19.7234
1167	4.05208	6187.52		19.7234
1168	4.05556	6110.72		19.8222
1169	4.05903	6080		19.7234
1170	4.0625	6144		19.7501
1171	4.06597	5946.88		19.8089
1172	4.06944	5928.96		19.7501
1173	4.07292	5954.56		19.6674
1174	4.07639	6026.24		19.5819
1175	4.07986	6087.68		19.4858
1176	4.08333	6049.28		19.3309
1177	4.08681	6039.04		19.3309
1178	4.09028	6044.16		19.2588
1179	4.09375	6082.56		19.1173
1180	4.09722	6039.04		19.0612
1181	4.10069	5982.72		19.0051
1182	4.10417	6113.28		18.8769
1183	4.10764	6097.92		18.8075
1184	4.11111	5900.8		18.8369
1185	4.11458	6210.56		18.682
1186	4.11806	6236.16		18.6687
1187	4.12153	6223.36		18.6526
1188	4.125	6149.12		18.5966
1189	4.12847	6144		18.5698
1190	4.13194	6133.76		18.4844
1191	4.13542	6138.88		18.4283
1192	4.13889	6195.2		18.3696
1193	4.14236	6231.04		18.3268
1194	4.14583	6128.64		18.2708
1195	4.14931	6151.68		18.2441
1196	4.15278	6328.32		18.2307
1197	4.15625	6225.92		18.2147
1198	4.15972	6233.6		18.172
1199	4.16319	6228.48		18.1586
1200	4.16667	6274.56		18.1025
1201	4.17014	6236.16		18.0892
1202	4.17361	6254.08		18.0758
1203	4.17708	6167.04		18.0892
1204	4.18056	6169.6		18.0598
1205	4.18403	6184.96		17.9343
1206	4.1875	6223.36		17.9076
1207	4.19097	6149.12		17.8088
1208	4.19444	6161.92		17.7367
1209	4.19792	0.02		17.4964
1210	4.20139	0.02		17.1172
1211	4.20486	0.04		16.7914
1212	4.20833	0.04		16.4817
1213	4.21181	0.04		16.1452
1214	4.21528	0.04		15.9182
1215	4.21875	0.03		15.7633
1216	4.22222	0.04		15.5951
1217	4.22569	0.04		15.4696
1218	4.22917	0.03		15.3147
1219	4.23264	0.02		15.1865
1220	4.23611	0.02		15.1438
1221	4.23958	0.02		15.0717
1222	4.24306	0.02		15.0023
1223	4.24653	0.02		14.9195
1224	4.25	0.02		14.8074
1225	4.25347	0.02		14.7353
1226	4.25694	0.02		14.6365
1227	4.26042	0.02		14.5537
1228	4.26389	0.02		14.4842
1229	4.26736	0.02		14.4389
1230	4.27083	0.02		14.3534
1231	4.27431	0.02		14.284
1232	4.27778	0.02		14.2279
1233	4.28125	4625.92		14.2412
1234	4.28472	6448.64		14.5109
1235	4.28819	6361.6		14.7646
1236	4.29167	6343.68		14.9756
1237	4.29514	6479.36		15.1011
1238	4.29861	6469.12		15.2132
1239	4.30208	6384.64		15.2853
1240	4.30556	6341.12		15.3414
1241	4.30903	6348.8		15.3841
1242	4.3125	6325.76		15.3414
1243	4.31597	6356.48		15.3147
1244	4.31944	6302.72		15.3414
1245	4.32292	6307.84		15.3147
1246	4.32639	6333.44		15.3281
1247	4.32986	6361.6		15.3574
1248	4.33333	6330.88		15.3574
1249	4.33681	6343.68		15.3975
1250	4.34028	6356.48		15.4402
1251	4.34375	6379.52		15.4829
1252	4.34722	6366.72		15.5524
1253	4.35069	6333.44		15.5097
1254	4.35417	6346.24		15.3841
1255	4.35764	6353.92		15.3708
1256	4.36111	6374.4		15.3281
1257	4.36458	6369.28		15.3147
1258	4.36806	6366.72		15.2586
1259	4.37153	6366.72		15.2426
1260	4.375	6369.28		15.2132
1261	4.37847	6364.16		15.1999
1262	4.38194	6364.16		15.1999
1263	4.38542	6336		15.2266
1264	4.38889	6376.96		15.2426
1265	4.39236	6392.32		15.3147
1266	4.39583	6440.96		15.3014
1267	4.39931	6387.2		15.2266
1268	4.40278	6371.84		15.1705
1269	4.40625	6392.32		15.1144
1270	4.40972	6369.28		15.1144
1271	4.41319	6356.48		15.1438
1272	4.41667	6374.4		15.1438
1273	4.42014	6397.44		15.1705
1274	4.42361	6384.64		15.1999
1275	4.42708	6208		15.1999
1276	4.43056	6343.68		15.1572
1277	4.43403	6425.6		15.1278
1278	4.4375	6430.72		15.1438
1279	4.44097	6417.92		15.1572
1280	4.44444	6384.64		15.1999
1281	4.44792	6361.6		15.1865
1282	4.45139	6400		15.1438
1283	4.45486	6405.12		15.2426
1284	4.45833	6405.12		15.3014
1285	4.46181	6392.32		15.3147
1286	4.46528	6369.28		15.3147
1287	4.46875	6392.32		15.3147
1288	4.47222	6389.76		15.3014
1289	4.47569	6417.92		15.3574
1290	4.47917	6405.12		15.4135
1291	4.48264	6440.96		15.3414
1292	4.48611	6412.8		15.3708
1293	4.48958	6433.28		15.3574
1294	4.49306	6364.16		15.3414
1295	4.49653	6382.08		15.3014
1296	4.5	6374.4		15.2853
1297	4.50347	6387.2		15.3414
1298	4.50694	6379.52		15.2853
1299	4.51042	6346.24		15.3281
1300	4.51389	6407.68		15.4135
1301	4.51736	6400		15.4536
1302	4.52083	6379.52		15.5097
1303	4.52431	6348.8		15.4402
1304	4.52778	6361.6		15.4135
1305	4.53125	6400		15.4696
1306	4.53472	6417.92		15.4402
1307	4.53819	6389.76		15.5524
1308	4.54167	6330.88		15.5951
1309	4.54514	6376.96		15.5657
1310	4.54861	6346.24		15.4963
1311	4.55208	6343.68		15.4269
1312	4.55556	6310.4		15.3975
1313	4.55903	6310.4		15.4269
1314	4.5625	6333.44		15.4269
1315	4.56597	6379.52		15.3708
1316	4.56944	6387.2		15.3147
1317	4.57292	6423.04		15.272
1318	4.57639	6566.4		15.1999
1319	4.57986	6758.4		15.2132
1320	4.58333	7029.76		15.1999
1321	4.58681	6888.96		15.1865
1322	4.59028	7014.4		15.1705
1323	4.59375	7121.92		15.2426
1324	4.59722	7296		15.2586
1325	4.60069	7170.56		15.3147
1326	4.60417	7557.12		15.2853
1327	4.60764	7610.88		15.3147
1328	4.61111	7859.2		15.4269
1329	4.61458	1747.84		15.3708
1330	4.61806	2342.4		15.1438
1331	4.62153	2108.8		15.0317
1332	4.625	1981.44		14.9329
1333	4.62847	2444.8		14.7913
1334	4.63194	2576		14.8074
1335	4.63542	3152.64		14.8474
1336	4.63889	3630.08		14.9329
1337	4.64236	3507.2		15.1278
1338	4.64583	3340.8		15.3574
1339	4.64931	2789.12		15.5657
1340	4.65278	3665.92		15.6939
1341	4.65625	3713.28		15.8328
1342	4.65972	4650.24		15.9876
1343	4.66319	4065.28		16.2013
1344	4.66667	4554.24		16.3989
1345	4.67014	4188.16		16.6098
1346	4.67361	4963.84		16.8048
1347	4.67708	6627.84		17.1466
1348	4.68056	5544.96		17.5525
1349	4.68403	4152.32		17.8088
1350	4.6875	10506.2		18.0037
1351	4.69097	11340.8		18.6393
1352	4.69444	7326.72		18.9757
1353	4.69792	12958.7		19.4564
1354	4.70139	12615.7		20.2041
1355	4.70486	9054.72		20.5966
1356	4.70833	10496		20.8103
1357	4.71181	15436.8		20.9651
1358	4.71528	6458.88		21.2455
1359	4.71875	9676.8		21.2749
1360	4.72222	8512		21.4591
1361	4.72569	9090.56		21.7262
1362	4.72917	8939.52		21.9799
1363	4.73264	12513.3		22.2202
1364	4.73611	12784.6		22.5727
1365	4.73958	11827.2		22.7703
1366	4.74306	27914.2		23.1788
1367	4.74653	31969.3		24.0253
1368	4.75	32010.2		24.8425
1369	4.75347	33914.9		25.6195
1370	4.75694	25446.4		25.972
1371	4.76042	10869.8		26.2818
1372	4.76389	9077.76		25.6756
1373	4.76736	8888.32		25.1816
1374	4.77083	39311.4		24.8718
1375	4.77431	40714.2		25.7317
1376	4.77778	41738.2		26.8479
1377	4.78125	44236.8		27.7638
1378	4.78472	39270.4		28.2845
1379	4.78819	43950.1		28.8079
1380	4.79167	13772.8		29.4408
1381	4.79514	44400.6		29.4274
1382	4.79861	47861.8		30.1324
1383	4.80208	35358.7		30.4448
1384	4.80556	46694.4		30.6985
1385	4.80903	41205.8		30.7946
1386	4.8125	49111		31.2325
1387	4.81597	47677.4		31.5156
1388	4.81944	13496.3		31.7426
1389	4.82292	31457.3		30.8801
1390	4.82639	29931.5		30.5142
1391	4.82986	26746.9		30.4128
1392	4.83333	28477.4		30.4128
1393	4.83681	9784.32		29.6811
1394	4.84028	14346.2		28.6797
1395	4.84375	14919.7		28.0335
1396	4.84722	10552.3		27.4807
1397	4.85069	14361.6		27.0428
1398	4.85417	18785.3		26.8185
1399	4.85764	12702.7		26.7037
1400	4.86111	10265.6		26.96
1401	4.86458	22609.9		27.2271
1402	4.86806	9822.72		27.3526
1403	4.87153	9367.04		27.0989
1404	4.875	8614.4		26.8746
1405	4.87847	29685.8		27.0855
1406	4.88194	24422.4		27.4807
1407	4.88542	29798.4		28.0175
1408	4.88889	21033		28.5515
1409	4.89236	24350.7		28.7518
1410	4.89583	23255		28.653
1411	4.89931	19512.3		28.6664
1412	4.90278	14013.4		28.5088
1413	4.90625	9756.16		28.2418
1414	4.90972	7823.36		27.8893
1415	4.91319	7298.56		27.7211
1416	4.91667	7096.32		27.6223
1417	4.92014	6950.4		27.5235
1418	4.92361	7564.8		27.4674
1419	4.92708	8171.52		27.6783
1420	4.93056	6351.36		27.8466
1421	4.93403	8980.48		28.0468
1422	4.9375	7495.68		28.2151
1423	4.94097	6717.44		28.1029
1424	4.94444	4952.32		27.7344
1425	4.94792	5931.52		27.2137
1426	4.95139	6277.12		27.0722
1427	4.95486	4908.8		27.0722
1428	4.95833	4371.2		26.9173
1429	4.96181	4391.68		26.6903
1430	4.96528	3591.68		26.2978
1431	4.96875	3440.64		25.8438
1432	4.97222	3740.16		25.6062
1433	4.97569	3646.72		25.4486
1434	4.97917	3265.28		25.211
1435	4.98264	2859.52		25.1255
1436	4.98611	2486.4		24.9706
1437	4.98958	2433.92		24.8131
1438	4.99306	2274.56		24.6448
1439	4.99653	2004.48		24.4339
1440	5	1861.76		24.1108
1441	5.00347	1638.4		23.801
1442	5.00694	1479.68		23.5447
1443	5.01042	1323.52		23.3497
1444	5.01389	1164.8		23.1228
1445	5.01736	956.48		22.8824
1446	5.02083	807.04		22.7008
1447	5.02431	667.52		22.4578
1448	5.02778	532		22.2202
1449	5.03125	2208		21.9665
1450	5.03472	6568.96		21.9959
1451	5.03819	6528		22.1214
1452	5.04167	6325.76		22.1908
1453	5.04514	6220.8		22.1908
1454	5.04861	6295.04		22.2068
1455	5.05208	6110.72		22.1347
1456	5.05556	6213.12		22.0653
1457	5.05903	6169.6		21.9959
1458	5.0625	6103.04		21.8971
1459	5.06597	6138.88		21.865
1460	5.06944	6210.56		21.7689
1461	5.07292	6300.16		21.6541
1462	5.07639	6243.84		21.5286
1463	5.07986	6231.04		21.4725
1464	5.08333	6238.72		21.3897
1465	5.08681	6243.84		21.3043
1466	5.09028	6179.84		21.2028
1467	5.09375	6187.52		21.104
1468	5.09722	6225.92		21.0212
1469	5.10069	6259.2		20.9224
1470	5.10417	6282.24		20.7542
1471	5.10764	5616.64		20.6527
1472	5.11111	6200.32		20.5966
1473	5.11458	6277.12		20.4551
1474	5.11806	6320.64		20.359
1475	5.12153	6251.52		20.2735
1476	5.125	6248.96		20.132
1477	5.12847	6215.68		20.0919
1478	5.13194	6251.52		20.0626
1479	5.13542	6231.04		20.0065
1480	5.13889	6233.6		19.8783
1481	5.14236	6233.6		19.7795
1482	5.14583	6323.2		19.7101
1483	5.14931	6351.36		19.6807
1484	5.15278	6264.32		19.6941
1485	5.15625	6272		19.6674
1486	5.15972	6320.64		19.638
1487	5.16319	6305.28		19.5819
1488	5.16667	6315.52		19.4858
1489	5.17014	6359.04		19.4991
1490	5.17361	6307.84		19.4697
1491	5.17708	6323.2		19.387
1492	5.18056	6302.72		19.3309
1493	5.18403	6330.88		19.2588
1494	5.1875	6346.24		19.2454
1495	5.19097	6312.96		19.16
1496	5.19444	6402.56		19.0612
1497	5.19792	0.04		18.8636
1498	5.20139	0.04		18.4844
1499	5.20486	0.04		18.1453
1500	5.20833	0.04		17.8355
1501	5.21181	0.04		17.5818
1502	5.21528	0.03		17.3415
1503	5.21875	0.02		17.1305
1504	5.22222	0.03		17.0184
1505	5.22569	0.02		16.8795
1506	5.22917	0.03		16.7353
1507	5.23264	0.02		16.6499
1508	5.23611	0.02		16.5805
1509	5.23958	0.03		16.4977
1510	5.24306	0.03		16.3989
1511	5.24653	0.03		16.3695
1512	5.25	0.03		16.3268
1513	5.25347	0.03		16.2867
1514	5.25694	0.04		16.2573
1515	5.26042	0.04		16.2707
1516	5.26389	0.04		16.2573
1517	5.26736	0.04		16.3561
1518	5.27083	0.04		16.4122
1519	5.27431	0.04		16.4817
1520	5.27778	0.04		16.511
1521	5.28125	4615.68		16.5938
1522	5.28472	6415.36		16.9356
1523	5.28819	6423.04		17.2988
1524	5.29167	6435.84		17.5978
1525	5.29514	6435.84		17.8088
1526	5.29861	6402.56		18.0465
1527	5.30208	6359.04		18.188
1528	5.30556	6397.44		18.3135
1529	5.30903	6346.24		18.4417
1530	5.3125	6479.36		18.5698
1531	5.31597	6461.44		18.6687
1532	5.31944	6369.28		18.8636
1533	5.32292	6374.4		18.8636
1534	5.32639	6371.84		18.9197
1535	5.32986	6371.84		18.8502
1536	5.33333	6369.28		18.8636
1537	5.33681	6387.2		18.8636
1538	5.34028	6402.56		18.9063
1539	5.34375	6430.72		18.949
1540	5.34722	6223.36		18.893
1541	5.35069	6379.52		18.9063
1542	5.35417	6407.68		18.893
1543	5.35764	6392.32		18.893
1544	5.36111	6359.04		18.9063
1545	5.36458	6371.84		18.9063
1546	5.36806	6364.16		18.893
1547	5.37153	6348.8		18.949
1548	5.375	6369.28		18.933
1549	5.37847	6369.28		18.8636
1550	5.38194	6389.76		18.8636
1551	5.38542	6376.96		18.8502
1552	5.38889	6402.56		18.9197
1553	5.39236	6425.6		18.9757
1554	5.39583	6382.08		19.0185
1555	5.39931	6374.4		18.949
1556	5.40278	6346.24		18.9197
1557	5.40625	6384.64		18.949
1558	5.40972	6343.68		19.0185
1559	5.41319	6359.04		19.0051
1560	5.41667	6425.6		19.0185
1561	5.42014	6356.48		19.0185
1562	5.42361	6374.4		19.0745
1563	5.42708	6379.52		18.9757
1564	5.43056	6394.88		18.933
1565	5.43403	6430.72		18.933
1566	5.4375	6438.4		18.893
1567	5.44097	6423.04		18.933
1568	5.44444	6420.48		18.9197
1569	5.44792	6379.52		18.9063
1570	5.45139	6423.04		18.9063
1571	5.45486	6364.16		18.893
1572	5.45833	6387.2		18.7942
1573	5.46181	6402.56		18.6954
1574	5.46528	6412.8		18.7942
1575	5.46875	6446.08		18.7514
1576	5.47222	6410.24		18.6954
1577	5.47569	6407.68		18.6954
1578	5.47917	6438.4		18.6954
1579	5.48264	6471.68		18.7942
1580	5.48611	6461.44		18.7381
1581	5.48958	6433.28		18.7087
1582	5.49306	6392.32		18.6259
1583	5.49653	6407.68		18.5538
1584	5.5	6420.48		18.4844
1585	5.50347	6400		18.4844
1586	5.50694	6397.44		18.5966
1587	5.51042	6397.44		18.5405
1588	5.51389	6402.56		18.4844
1589	5.51736	6394.88		18.5698
1590	5.52083	6330.88		18.4577
1591	5.52431	6346.24		18.4577
1592	5.52778	6400		18.4016
1593	5.53125	6405.12		18.3001
1594	5.53472	6412.8		18.2574
1595	5.53819	6402.56		18.3001
1596	5.54167	6405.12		18.2307
1597	5.54514	6379.52		18.2013
1598	5.54861	6266.88		18.0598
1599	5.55208	6336		18.0758
1600	5.55556	6325.76		18.0598
1601	5.55903	6353.92		18.0758
1602	5.5625	6420.48		18.0198
1603	5.56597	6456.32		18.0037
1604	5.56944	6584.32		17.9904
1605	5.57292	6563.84		18.0198
1606	5.57639	6545.92		17.8649
1607	5.57986	6638.08		17.8649
1608	5.58333	6694.4		17.9343
1609	5.58681	6699.52		17.8515
1610	5.59028	6789.12		17.8222
1611	5.59375	6778.88		17.7234
1612	5.59722	7060.48		17.7661
1613	5.60069	7290.88		17.6967
1614	5.60417	7424		17.7661
1615	5.60764	7482.88		17.8222
1616	5.61111	7260.16		17.8649
1617	5.61458	834.24		17.7794
1618	5.61806	961.6		17.483
1619	5.62153	1351.68		17.2293
1620	5.625	1452.8		17.0478
1621	5.62847	2023.04		16.8368
1622	5.63194	2391.04		16.7647
1623	5.63542	2302.72		16.7353
1624	5.63889	1846.4		16.6659
1625	5.64236	2040.96		16.5938
1626	5.64583	2413.44		16.511
1627	5.64931	2000		16.4416
1628	5.65278	1808		16.3561
1629	5.65625	2270.72		16.2573
1630	5.65972	2244.48		16.2306
1631	5.66319	2549.76		16.1585
1632	5.66667	3648		16.2306
1633	5.67014	3641.6		16.3001
1634	5.67361	4519.68		16.4549
1635	5.67708	4106.24		16.4977
1636	5.68056	4006.4		16.5938
1637	5.68403	5075.2		16.7353
1638	5.6875	4311.04		16.8235
1639	5.69097	4275.2		16.9356
1640	5.69444	3845.12		16.9917
1641	5.69792	3682.56		17.0317
1642	5.70139	3814.4		17.0478
1643	5.70486	4080.64		17.005
1644	5.70833	4501.76		17.0745
1645	5.71181	4806.4		17.1866
1646	5.71528	5009.92		17.2988
1647	5.71875	4948.48		17.3148
1648	5.72222	6092.8		17.3842
1649	5.72569	6696.96		17.5525
1650	5.72917	8322.56		17.7234
1651	5.73264	10237.4		18.0331
1652	5.73611	10275.8		18.4977
1653	5.73958	9845.76		18.7942
1654	5.74306	10690.6		18.949
1655	5.74653	10762.2		19.2588
1656	5.75	11950.1		19.5685
1657	5.75347	12518.4		19.8917
1658	5.75694	13634.6		20.148
1659	5.76042	11607		20.3029
1660	5.76389	10147.8		20.3857
1661	5.76736	10224.6		20.415
1662	5.77083	17889.3		20.4711
1663	5.77431	14172.2		20.6394
1664	5.77778	13998.1		20.893
1665	5.78125	10547.2		20.853
1666	5.78472	10496		20.8236
1667	5.78819	8555.52		20.6981
1668	5.79167	9469.44		20.4978
1669	5.79514	6658.56		20.3429
1670	5.79861	7828.48		20.0626
1671	5.80208	7431.68		19.865
1672	5.80556	6732.8		19.6807
1673	5.80903	8819.2		19.5979
1674	5.8125	7457.28		19.6674
1675	5.81597	8281.6		19.6246
1676	5.81944	8460.8		19.654
1677	5.82292	7418.88		19.6113
1678	5.82639	8386.56		19.5418
1679	5.82986	8627.2		19.6113
1680	5.83333	8417.28		19.6941
1681	5.83681	6863.36		19.6807
1682	5.84028	5921.28		19.5979
1683	5.84375	6225.92		19.5552
1684	5.84722	5788.16		19.4564
1685	5.85069	5903.36		19.4297
1686	5.85417	5534.72		19.2882
1687	5.85764	7848.96		19.2321
1688	5.86111	8227.84		19.2588
1689	5.86458	7198.72		19.3149
1690	5.86806	8268.8		19.3149
1691	5.87153	9331.2		19.4137
1692	5.875	6302.72		19.4564
1693	5.87847	5923.84		19.3309
1694	5.88194	5721.6		19.2321
1695	5.88542	5532.16		19.0612
1696	5.88889	5452.8		18.9063
1697	5.89236	4855.04		18.8636
1698	5.89583	4321.28		18.7247
1699	5.89931	4981.76		18.6526
1700	5.90278	4047.36		18.6393
1701	5.90625	4186.88		18.6099
1702	5.90972	3933.44		18.5538
1703	5.91319	3764.48		18.3829
1704	5.91667	3057.92		18.2708
1705	5.92014	2602.24		18.1319
1706	5.92361	2722.56		18.0037
1707	5.92708	2819.84		17.8649
1708	5.93056	2513.28		17.7794
1709	5.93403	2616.96		17.6806
1710	5.9375	2753.28		17.6112
1711	5.94097	3228.16		17.5391
1712	5.94444	3526.4		17.5257
1713	5.94792	3179.52		17.5391
1714	5.95139	3124.48		17.5818
1715	5.95486	3123.2		17.5257
1716	5.95833	3116.8		17.4964
1717	5.96181	3475.2		17.5818
1718	5.96528	3101.44		17.5978
1719	5.96875	2406.4		17.5818
1720	5.97222	2319.36		17.5818
1721	5.97569	2476.8		17.4269
1722	5.97917	2632.96		17.3415
1723	5.98264	2627.84		17.2854
1724	5.98611	2134.4		17.3281
1725	5.98958	1733.12		17.2854
1726	5.99306	1365.12		17.1866
1727	5.99653	1088		17.1866
1728	6	888.32		17.1172
1729	6.00347	763.52		16.9917
1730	6.00694	687.36		16.8795
1731	6.01042	650.56		16.7353
1732	6.01389	482.08		16.6098
1733	6.01736	336.16		16.5537
1734	6.02083	276.16		16.5244
1735	6.02431	223.28		16.4817
1736	6.02778	186		16.4122
1737	6.03125	2030.72		16.3855
1738	6.03472	6312.96		16.5671
1739	6.03819	6259.2		16.8502
1740	6.04167	6325.76		17.0745
1741	6.04514	6248.96		17.2427
1742	6.04861	6220.8		17.3976
1743	6.05208	6218.24		17.4697
1744	6.05556	6243.84		17.4964
1745	6.05903	6062.08		17.5978
1746	6.0625	5918.72		17.5818
1747	6.06597	6131.2		17.5257
1748	6.06944	6284.8		17.483
1749	6.07292	6110.72		17.4537
1750	6.07639	6167.04		17.4403
1751	6.07986	6205.44		17.4269
1752	6.08333	6261.76		17.4109
1753	6.08681	6272		17.3548
1754	6.09028	6251.52		17.3148
1755	6.09375	6251.52		17.2587
1756	6.09722	6292.48		17.2427
1757	6.10069	6320.64		17.2026
1758	6.10417	6341.12		17.216
1759	6.10764	6284.8		17.1466
1760	6.11111	6351.36		17.1038
1761	6.11458	6310.4		17.0745
1762	6.11806	6333.44		17.0478
1763	6.12153	6389.76		17.0611
1764	6.125	6343.68		17.005
1765	6.12847	6241.28		17.0184
1766	6.13194	6259.2		16.8795
1767	6.13542	6264.32		16.7487
1768	6.13889	6423.04		16.7086
1769	6.14236	6336		16.5671
1770	6.14583	6192.64		16.4683
1771	6.14931	6192.64		16.4122
1772	6.15278	6261.76		16.3268
1773	6.15625	6220.8		16.2573
1774	6.15972	6479.36		16.2306
1775	6.16319	6517.76		16.1746
1776	6.16667	6801.92		16.0891
1777	6.17014	6586.88		16.0624
1778	6.17361	6568.96		15.9876
1779	6.17708	6673.92		15.9609
1780	6.18056	6658.56		15.9476
1781	6.18403	6661.12		15.9182
1782	6.1875	6423.04		15.8755
1783	6.19097	6443.52		15.7927
1784	6.19444	6440.96		15.7366
1785	6.19792	0.04		15.5951
1786	6.20139	0.04		15.2426
1787	6.20486	0.05		14.9035
1788	6.20833	0.03		14.5804
1789	6.21181	0.03		14.3961
1790	6.21528	0.02		14.2412
1791	6.21875	0.03		14.1024
1792	6.22222	0.03		13.9475
1793	6.22569	0.03		13.8754
1794	6.22917	0.03		13.806
1795	6.23264	0.03		13.7232
1796	6.23611	0.02		13.6778
1797	6.23958	0.03		13.6057
1798	6.24306	0.03		13.5096
1799	6.24653	0.03		13.4802
1800	6.25	0.03		13.4375
1801	6.25347	0.02		13.4108
1802	6.25694	0.02		13.3547
1803	6.26042	0.02		13.312
1804	6.26389	0.03		13.2692
1805	6.26736	0.02		13.2559
1806	6.27083	0.02		13.2132
1807	6.27431	0.02		13.1865
1808	6.27778	0.02		13.1865
1809	6.28125	5145.6		13.1704
1810	6.28472	6487.04		13.4535
1811	6.28819	6533.12		13.7793
1812	6.29167	6471.68		14.0169
1813	6.29514	6440.96		14.2145
1814	6.29861	6412.8		14.34
1815	6.30208	6218.24		14.4255
1816	6.30556	6451.2		14.5109
1817	6.30903	6412.8		14.6231
1818	6.3125	6415.36		14.6525
1819	6.31597	6407.68		14.7086
1820	6.31944	6435.84		14.7086
1821	6.32292	6438.4		14.7219
1822	6.32639	6464		14.7086
1823	6.32986	6374.4		14.7219
1824	6.33333	6430.72		14.7353
1825	6.33681	6430.72		14.7219
1826	6.34028	6443.52		14.7486
1827	6.34375	6400		14.6925
1828	6.34722	6384.64		14.6925
1829	6.35069	6387.2		14.7486
1830	6.35417	6435.84		14.7353
1831	6.35764	6515.2		14.7646
1832	6.36111	6451.2		14.778
1833	6.36458	6405.12		14.7353
1834	6.36806	6469.12		14.7486
1835	6.37153	6461.44		14.7219
1836	6.375	6461.44		14.7086
1837	6.37847	6405.12		14.6925
1838	6.38194	6420.48		14.6792
1839	6.38542	6453.76		14.6525
1840	6.38889	6428.16		14.6792
1841	6.39236	6464		14.6658
1842	6.39583	6435.84		14.6525
1843	6.39931	6466.56		14.6792
1844	6.40278	6443.52		14.6525
1845	6.40625	6443.52		14.6097
1846	6.40972	6474.24		14.6365
1847	6.41319	6502.4		14.6365
1848	6.41667	6359.04		14.6365
1849	6.42014	6307.84		14.6525
1850	6.42361	6330.88		14.6525
1851	6.42708	6282.24		14.6658
1852	6.43056	6307.84		14.6365
1853	6.43403	6269.44		14.6365
1854	6.4375	6261.76		14.6231
1855	6.44097	6272		14.6097
1856	6.44444	6256.64		14.6231
1857	6.44792	6292.48		14.5804
1858	6.45139	6353.92		14.567
1859	6.45486	6341.12		14.5804
1860	6.45833	6330.88		14.5243
1861	6.46181	6295.04		14.4976
1862	6.46528	6305.28		14.5109
1863	6.46875	6318.08		14.4522
1864	6.47222	6307.84		14.4976
1865	6.47569	6279.68		14.4976
1866	6.47917	6302.72		14.5109
1867	6.48264	6315.52		14.5109
1868	6.48611	6307.84		14.5804
1869	6.48958	6251.52		14.6097
1870	6.49306	6325.76		14.5964
1871	6.49653	6330.88		14.6231
1872	6.5	6323.2		14.5964
1873	6.50347	6318.08		14.6097
1874	6.50694	6295.04		14.6097
1875	6.51042	6302.72		14.6658
1876	6.51389	6300.16		14.6658
1877	6.51736	6292.48		14.7086
1878	6.52083	6261.76		14.7086
1879	6.52431	6248.96		14.7353
1880	6.52778	6264.32		14.7219
1881	6.53125	6287.36		14.7219
1882	6.53472	6289.92		14.6792
1883	6.53819	6113.28		14.6925
1884	6.54167	6256.64		14.6658
1885	6.54514	6289.92		14.6658
1886	6.54861	6149.12		14.6525
1887	6.55208	6126.08		14.5804
1888	6.55556	6120.96		14.5403
1889	6.55903	6108.16		14.5537
1890	6.5625	6151.68		14.5537
1891	6.56597	6248.96		14.567
1892	6.56944	6259.2		14.6097
1893	6.57292	6251.52		14.5804
1894	6.57639	6320.64		14.567
1895	6.57986	6351.36		14.567
1896	6.58333	6440.96		14.5109
1897	6.58681	6663.68		14.4842
1898	6.59028	6735.36		14.4976
1899	6.59375	7063.04		14.5403
1900	6.59722	7208.96		14.5964
1901	6.60069	7201.28		14.6925
1902	6.60417	7308.8		14.778
1903	6.60764	7372.8		14.8207
1904	6.61111	7600.64		14.9329
1905	6.61458	1959.04		14.8474
1906	6.61806	2082.56		14.6097
1907	6.62153	2493.44		14.4095
1908	6.625	2407.04		14.2973
1909	6.62847	3002.88		14.2546
1910	6.63194	2431.36		14.2412
1911	6.63542	2490.88		14.2279
1912	6.63889	3536.64		14.2973
1913	6.64236	2740.48		14.3667
1914	6.64583	2304		14.4095
1915	6.64931	3650.56		14.4976
1916	6.65278	3677.44		14.6231
1917	6.65625	4472.32		14.7913
1918	6.65972	4052.48		14.9756
1919	6.66319	4222.72		15.1278
1920	6.66667	3957.76		15.3147
1921	6.67014	4737.28		15.539
1922	6.67361	5227.52		15.8061
1923	6.67708	6622.72		16.1025
1924	6.68056	6402.56		16.4122
1925	6.68403	9912.32		16.7781
1926	6.6875	18723.8		17.5818
1927	6.69097	17131.5		18.3429
1928	6.69444	8957.44		18.5405
1929	6.69792	19558.4		18.8636
1930	6.70139	19353.6		19.7234
1931	6.70486	21104.6		20.2468
1932	6.70833	22753.3		20.8663
1933	6.71181	13045.8		21.1761
1934	6.71528	22016		21.2455
1935	6.71875	22814.7		21.6541
1936	6.72222	19671		22.052
1937	6.72569	16583.7		22.0226
1938	6.72917	13726.7		22.0092
1939	6.73264	17489.9		21.9104
1940	6.73611	9940.48		21.8971
1941	6.73958	10465.3		21.865
1942	6.74306	10424.3		21.7956
1943	6.74653	10378.2		21.9104
1944	6.75	10608.6		22.1641
1945	6.75347	10731.5		22.3884
1946	6.75694	10557.4		22.4151
1947	6.76042	11581.4		22.359
1948	6.76389	9208.32		22.359
1949	6.76736	10757.1		22.3457
1950	6.77083	15237.1		22.546
1951	6.77431	14141.4		22.7836
1952	6.77778	16890.9		22.9385
1953	6.78125	15851.5		23.291
1954	6.78472	16578.6		23.307
1955	6.78819	22814.7		23.4752
1956	6.79167	18114.6		23.7449
1957	6.79514	27668.5		24.1508
1958	6.79861	32000		24.7436
1959	6.80208	19399.7		25.0561
1960	6.80556	26634.2		25.211
1961	6.80903	19036.2		25.3658
1962	6.8125	24340.5		25.0134
1963	6.81597	18048		24.757
1964	6.81944	15308.8		24.5888
1965	6.82292	20505.6		24.5888
1966	6.82639	20945.9		24.757
1967	6.82986	16460.8		24.9573
1968	6.83333	32307.2		25.1389
1969	6.83681	29102.1		25.5367
1970	6.84028	23101.4		25.6195
1971	6.84375	15027.2		25.5047
1972	6.84722	13982.7		25.5047
1973	6.85069	20899.8		25.478
1974	6.85417	19978.2		25.4059
1975	6.85764	13066.2		25.4219
1976	6.86111	11514.9		25.211
1977	6.86458	10263		24.8425
1978	6.86806	9658.88		24.4633
1979	6.87153	10219.5		24.1508
1980	6.875	10140.2		24.012
1981	6.87847	9832.96		23.8144
1982	6.88194	9960.96		23.6702
1983	6.88542	9502.72		23.7316
1984	6.88889	9413.12		23.7877
1985	6.89236	9815.04		23.8838
1986	6.89583	9474.56		23.8838
1987	6.89931	9400.32		23.801
1988	6.90278	8066.56		23.6435
1989	6.90625	8450.56		23.4886
1990	6.90972	8258.56		23.3764
1991	6.91319	8911.36		23.4192
1992	6.91667	7070.72		23.3337
1993	6.92014	7354.88		23.08
1994	6.92361	6824.96		23.0079
1995	6.92708	5006.08		22.9118
1996	6.93056	5496.32		22.6715
1997	6.93403	5167.36		22.5032
1998	6.9375	4788.48		22.2763
1999	6.94097	4779.52		22.0653
[truncated: 15,659 more rows]

## Sheet: plant hight(cm)
A12359
photoperiod	22/2			18/6			14/10
weeks	plant hight(cm)			plant hight(cm)			plant hight(cm)
2	27.7	22.8	33.1	14.4	10.5	13.3	9	10.1	10.3
4	42.5	51.5	46.3	31.7	32.8	33.6	17.6	18	13
6	22.2	22.4	23.9	24.6	23.3	29.6	17	13.5	12
8	21.2	20.4	22.5	26.9	27	22.1	11	12	14.7
10	36.4	35.4	33	32.5	29.4	27.2	13	16.2	11.5
12	31.7	36	33.1	24.2	24.7	26.3	10.5	11	15.8
14	19.1	21.4	22.5	19	19	20.6	12.3	11.5	13
ABD11
photoperiod	22/2			18/6			14/10
weeks	plant hight(cm)			plant hight(cm)			plant hight(cm)
2	13.8	15.2	14	11.5	9.3	11.5	10	9	8.2
4	21	21.6	20	18.5	15.5	14.4	10.5	11.1	13.5
6	24.1	23	23	21.2	22.1	23.4	14	16.6	18.7
8	19.5	20.6	20.1	18.6	20.1	21	18.2	18.1	19.5
10	26	23.7	24	20.3	22	20.5	18.9	19.1	17.2
12	21.5	24	22.6	18	21.5	17.6	17	19.7	16.9
14	20	18.4	19.1	16.8	17	17.1	16.5	16.4	15.8

## Sheet: fresh weight(g)
A12359
photoperiod	22/2			18/6			14/10
weeks	fresh weight(g)			fresh weight(g)			fresh weight(g)
4	2.197	1.648	1.897	0.961	0.582	1.563	0.084	0.121	0.078
6	0.871	1.298	1.279	0.956	0.913	0.927	0.104	0.19	0.169
8	1.776	1.892	2.47	1.288	2.32	1.209	0.152	0.089	0.536
10	3.065	3.547	3.78	3.092	2.488	3.81	0.073	0.925	0.845
12	5.221	6.013	6.276	4.325	4.491	1.669	0.075	0.787	1.566
14	1.994	1.803	1.41	1.206	0.909	1.513	0	0.209	0.583
ABD11
photoperiod	22/2			18/6			14/10
weeks	fresh weight(g)			fresh weight(g)			fresh weight(g)
4	0.523	0.303	0.192	0.193	0.02	0.016	0.052	0.012	0
6	1.309	1.398	1.669	1.007	0.537	0.743	0.028	0.043	0.082
8	3.13	3.336	2.452	1.026	1.007	1.207	1.055	0.364	0.711
10	2.301	2.108	2.695	0.877	1.735	1.55	1.445	1.309	1.482
12	1.708	1.515	1.497	0.606	0.322	0.551	0.888	0.724	0.507
14	1.778	1.772	1.212	0.715	0.567	0.891	0.388	0.51	0.809

## Sheet: dry weight(g)
A12359
photoperiod	22/2			18/6			14/10
weeks	dry weight(g)			dry weight(g)			dry weight(g)
4	0.6433	0.4827	0.4189	0.2504	0.1245	0.3356	0.0203	0.0456	0.0188
6	0.2283	0.3647	0.3205	0.2491	0.287	0.2471	0.0622	0.0574	0.0463
8	0.54	0.543	0.678	0.298	0.715	0.344	0.062	0.021	0.148
10	0.732	0.789	0.922	1.021	0.647	0.99	0.028	0.204	0.182
12	1.373	1.556	1.443	1.126	1.206	0.477	0.026	0.152	0.352
14	0.611	0.529	0.462	0.385	0.323	0.483	0	0.046	0.174
ABD11
photoperiod	22/2			18/6			14/10
weeks	dry weight(g)			dry weight(g)			dry weight(g)
4	0.1325	0.0826	0.0473	0.0506	0.0094	0.0051	0.0126	0.0043	0
6	0.3785	0.3538	0.478	0.2969	0.1474	0.2406	0.0074	0.0109	0.0237
8	0.925	0.965	0.679	0.318	0.269	0.337	0.242	0.077	0.178
10	0.738	0.577	0.813	0.287	0.508	0.464	0.351	0.332	0.443
12	0.505	0.451	0.44	0.193	0.122	0.188	0.228	0.187	0.14
14	0.546	0.578	0.365	0.234	0.175	0.288	0.094	0.156	0.228

## Sheet: N（mg)
A12359
photoperiod	22/2			18/6			14/10
weeks	N(mg)			N(mg)			N(mg)
4	11.6991	11.548	11.6235	5.93552	5.96113	5.94832	1.08545	1.01432	1.04988
6	13.9333	13.4217	13.6775	8.60605	8.93697	8.77151	2.12652	2.06052	2.09352
8	16.746	15.3497	16.0478	18.0365	17.3806	17.7086	3.30965	3.16006	3.23486
10	32.0334	32.8222	32.4278	32.5496	30.8644	31.707	5.95054	5.501	5.72577
12	44.3138	43.3264	43.8201	24.6271	24.3651	24.4961	7.40536	7.67415	7.53975
14	17.3706	17.8836	17.6271	10.9391	10.6252	10.7822	4.55195	4.35325	4.4526
ABD11
photoperiod	22/2			18/6			14/10
weeks	N(mg)			N(mg)			N(mg)
4	2.62333	2.89889	2.76111	2.70914	2.66746	2.6883	0.367905	0.439501	0.403703
6	19.5717	18.5947	19.0832	11.7391	11.7158	11.7274	1.89009	1.81459	1.85234
8	32.7183	33.3223	33.0203	13.1256	13.2595	13.1925	7.39307	7.08862	7.24085
10	23.1821	22.5879	22.885	13.0138	11.9804	12.4971	13.9397	14.0392	13.9895
12	16.133	17.6925	16.9128	7.39249	7.2162	7.30435	11.9671	12.4323	12.1997
14	15.4989	15.643	15.571	7.6484	7.60904	7.62872	10.2778	10.2514	10.2646

## Sheet: P(mg)
A12359
photoperiod	22/2			18/6			14/10
weeks	P(mg)			P(mg)			P(mg)
4	2.15596	2.1997	2.17783	0.948187	0.945445	0.946816	0.181621	0.172762	0.177192
6	2.31265	2.16108	2.23687	1.53155	1.48474	1.50814	0.301504	0.294564	0.298034
8	3.02458	2.95343	2.989	2.81798	2.52945	2.67371	0.451774	0.413418	0.432596
10	4.80994	4.86019	4.83506	4.22792	4.09755	4.16274	0.979068	0.988178	0.983623
12	6.95584	7.11268	7.03426	4.46244	4.32202	4.39223	1.23484	1.27462	1.25473
14	2.45686	2.58973	2.52329	1.93	1.92913	1.92957	0.805344	0.771225	0.788284
ABD11
photoperiod	22/2			18/6			14/10
weeks	P(mg)			P(mg)			P(mg)
4	0.34577	0.331767	0.338769	0.242302	0.235162	0.238732	-0.0131164	-0.0195737	-0.0163451
6	2.59389	2.47603	2.53496	1.64273	1.46768	1.55521	0.280578	0.275444	0.278011
8	3.55694	3.33752	3.44723	1.56779	1.55256	1.56017	1.18961	1.15097	1.17029
10	3.3924	3.33249	3.36244	2.00531	2.01696	2.01114	2.0479	1.96749	2.00769
12	2.68492	2.90145	2.79319	1.13148	1.26155	1.19651	1.6924	1.65615	1.67428
14	2.73539	2.65348	2.69444	1.51774	1.45214	1.48494	1.94981	1.90884	1.92933

## Sheet: number of branch(each)
A12359
photoperiod	22/2			18/6			14/10
weeks	number of branch(each)			number of branch(each)			number of branch(each)
2	12	10	14	13	5	5	5	3	4
4	37	38	33	25	25	12	10	8	6
6	45	42	39	31	39	22	12	9	9
8	54	48	43	41	52	28	5	6	6
10	97	113	104	97	81	84	11	6	13
12	144	149	158	149	115	133	12	11	16
14	146	145	157	155	102	142	18	12	17
ABD11
photoperiod	22/2			18/6			14/10
weeks	number of branch(each）			number of branch(each)			number of branch(each)
2	21	12	35	7	12	15	1	4	3
4	46	50	22	39	37	50	15	13	14
6	94	50	97	41	30	54	20	16	24
8	191	93	155	85	69	65	42	38	34
10	233	232	148	131	115	121	78	70	67
12	243	230	240	137	174	115	109	99	100
14	310	266	279	169	113	141	153	160	153

## Sheet: number of flowering
A12359						ABD11
photoperiod	22/2	18/6	14/10			photoperiod	22/2	18/6	14/10
Weeks	number of flowering					Weeks	number of flowering
6.43	1	0	0			5.71	28	10	0
6.86	1	0	0			6.14	39	17	0
7.14	1	0	0			6.43	52	24	0
7.57	1	0	0			6.86	68	28	0
8	2	0	0			7.14	74	33	0
8.29	2	0	0			7.57	98	33	0
8.71	3	0	0			8	82	33	0
9.14	3	1	0			8.29	136	33	0
10	7	3	0			8.71	153	36	0
10.43	10	5	0			9.14	168	37	0
11	15	8	0			10	182	37	0
11.57	25	12	0			10.43	190	36	0
12	27	15	0			11	195	36	0
12.43	36	23	3			11.57	207	34	0
12.86	39	28	5			12	208	34	0
13.29	41	45	7			12.43	209	34	0
13.86	46	49	13			12.86	222	34	0
						13.29	242	34	0
						13.86	251	34	0
